# Supplementary material for: Polynitro-1,2,4-triazole-functionalized azo-furazans as high-performance and insensitive energetic materials
Source: Royal Society of Chemistry journal article supplement (doi:10.1039/c9nj01065c), 2019-01-01
Supplement: c9nj01065c1.pdf [file c9nj01065c1.pdf]

## Supporting Information (SI)

### **Polynitro-1, 2, 4-triazole functionalized azo-furazans as high performance and insensitive energetic materials**

Jinchao Ma, Guojie Zhang, Hao Gu, Jie Tang, Bohan Wang, Hongwei Yang, Guangbin Cheng \*

*School of Chemical Engineering, Nanjing University of Science and Technology, Xiaolingwei 200,*

*Nanjing, Jiangsu, China. Fax:(+86 25 8430 3286*

*E-mail: [gcheng@mail.njust.edu.cn](mailto:gcheng@mail.njust.edu.cn)*

## Table of Contents

|                                                               |   |
|---------------------------------------------------------------|---|
| 1. Computational data.....                                    | 3 |
| 2. Crystallographic data and refinement parameters of 3 ..... | 6 |
| 3. Mass spectrum of 8.....                                    | 8 |
| 4. <sup>1</sup> H NMR, <sup>13</sup> C NMR spectra.....       | 8 |

# 1. Computational data

All computations were carried out using the Gaussian09 program package.<sup>1</sup> The elementary geometric optimization and the frequency analysis were performed at the level of the Becke three parameter, Lee-Yan-Parr (B3LYP)<sup>2</sup> functional with the 6-311+G\*\* basis set.<sup>3</sup> All of the optimized structures were characterized to be local energy minima on the potential surface without any imaginary frequencies. Atomization energies were calculated by the CBS-4M.<sup>4</sup> All the optimized structures were characterized to be true local energy minima on the potential-energy surface without imaginary frequencies.

The predictions of heats of formation (HOF) of compounds used the hybrid DFTB3LYP methods with the 6-311+G\*\* basis set through designed isodesmic reactions (Scheme S1).

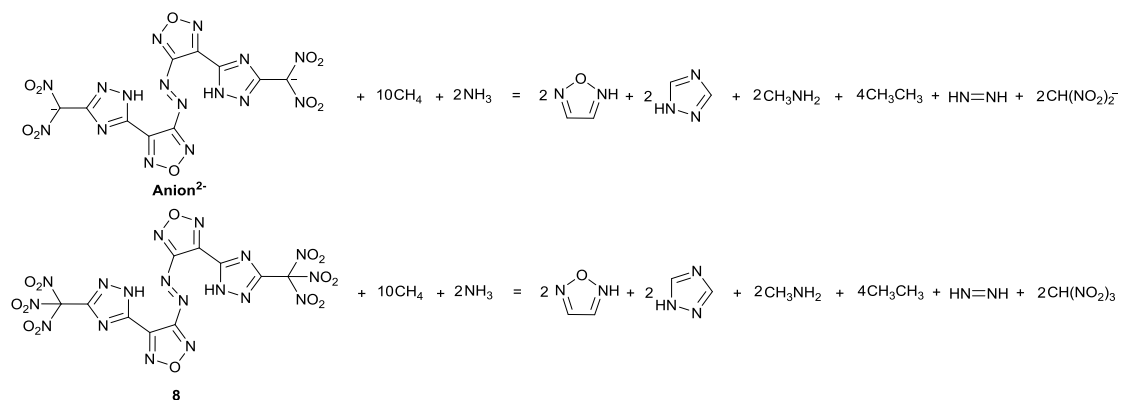

**Scheme S1.** Isodesmic and tautomeric reactions to compute the HOF

The change of enthalpy for the reactions at 298 K can be expressed as Equation (1).

$$\Delta H_{298} = \sum \Delta_i H_P - \sum \Delta_i H_R \quad (1)$$

$\Delta_i H_R$  and  $\Delta_i H_P$  are the HOF of the reactants and products at 298 K, respectively, and  $\Delta H_{298}$  can be calculated from the following expression, see Equation (2).

$$\Delta H_{298} = \Delta E_{298} + \Delta(PV) = \Delta E_0 + \Delta ZPE + \Delta H_T + \Delta nRT \quad (2)$$

$\Delta E_0$  is the change in total energy between the products and the reactants at 0 K;  $\Delta ZPE$  is the difference between the zero-point energies (ZPE) of the products and the reactants at 0 K;  $\Delta H_T$  is the thermal correction from 0 to 298 K. The  $\Delta(PV)$  value in Equation (2) is the  $PV$  work term. It equals  $\Delta nRT$  for the reactions of an ideal gas. For the isodesmic reactions,  $\Delta n = 0$ , so  $\Delta(PV) = 0$ . On the left side of Equation (1), apart from target compound, all the others are called reference compounds. The HOF of reference compounds are available either from experiments<sup>5</sup> or from the high-level computing such as CBS-4M.

$$\Delta H_f^\circ(\text{salt}, 298 \text{ K}) = \Delta H_f^\circ(\text{cation}, 298 \text{ K}) + \Delta H_f^\circ(\text{anion}, 298 \text{ K}) - \Delta H_L \quad (3)$$

$$\Delta H_L = U_{POT} + [p(nM/2-2) + q(nX/2-2)] RT \quad (4)$$

$$U_{POT} (\text{kJ mol}^{-1}) = \gamma (\rho_m/M_m)^{1/3} + \delta \quad (5)$$

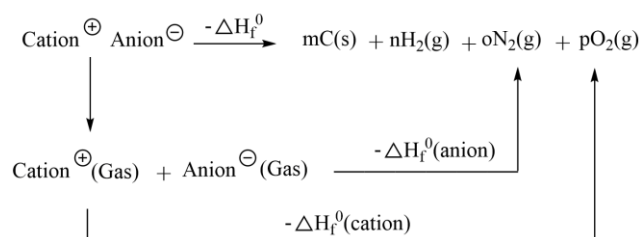

**Fig. S1** Born-Haber cycle for the formation of energetic salts.

Based on Born-Haber energy cycles, the heat of formation of a salt can be simplified and expressed as Equation (3), in which  $\Delta H_L$  is the lattice energy of the salt. This quantity could be predicted by the formula suggested by

Jenkins et al (Equation (4)), in which  $n_M$  and  $n_X$  depend on the nature of the ions  $Mp^+$  and  $Xq^-$ , respectively. The equation for the lattice potential energy,  $U_{POT}$ , takes the form of equation (5), where  $\rho_m$  ( $g\ cm^{-3}$ ) is the density,  $M_m$  (g) is the chemical formula mass of the ionic material and the coefficients  $\gamma$  ( $kJ\ mol^{-1}\ cm$ ) and  $\delta$  ( $kJ\ mol^{-1}$ ) are assigned literature values.

**Table S1.** *Ab initio* computational values of small molecules used in isodesmic and tautomeric reactions.

| Compound                           | $E_0^a$   | ZPE <sup>b</sup> | $H_T^c$ | HOF <sup>d</sup>    |
|------------------------------------|-----------|------------------|---------|---------------------|
| <b>Anion<sup>2-</sup></b>          | -2010.078 | 504.14           | 80.92   | 707.56              |
| <b>8</b>                           | -2420.063 | 575.08           | 97.28   | 1253.15             |
| CH <sub>4</sub>                    | -40.53    | 112.96           | 10.03   | -74.6 <sup>e</sup>  |
| NH <sub>3</sub>                    | -56.57    | 86.61            | 10.04   | -45.9 <sup>e</sup>  |
| CH <sub>3</sub> NH <sub>2</sub>    | -95.87    | 161.37           | 11.61   | -22.5 <sup>e</sup>  |
| CH <sub>3</sub> CH <sub>3</sub>    | -79.84    | 188.04           | 11.78   | -84 <sup>e</sup>    |
| NH=NH                              | -110.65   | 71.68            | 10      | 194.97 <sup>e</sup> |
| CH(NO <sub>2</sub> ) <sup>2-</sup> | -449.00   | 100.12           | 18.42   | -295.7 <sup>e</sup> |
| CH(NO <sub>2</sub> ) <sub>3</sub>  | -653.99   | 137.25           | 26.42   | -13.4 <sup>e</sup>  |
| 1, 2, 5-Furazan                    | -262.06   | 115.16           | 11.82   | 215.72 <sup>f</sup> |
| 1H-1, 2, 4-Triazole                | -242.27   | 150.94           | 12.07   | 192.7 <sup>f</sup>  |

<sup>a</sup> Total energy calculated by B3LYP/6-311+G\*\* method (a.u.=2625.5  $kJ\ mol^{-1}$ ); <sup>b</sup> zero-point correction ( $kJ\ mol^{-1}$ ); <sup>c</sup> thermal correction to enthalpy ( $kJ\ mol^{-1}$ ); <sup>d</sup> heat of formation ( $kJ\ mol^{-1}$ ); <sup>e</sup> D. R. Lide, CRC Handbook of Chemistry and Physics, 84th Edition (2003-2004), CRC Press/Taylor and Francis, Boca Raton, FL; <sup>f</sup> calculated by CBS-4 Enthalpy.

## References

- 1 M. J. Frisch, G. W. Trucks, H. B. Schlegel, G. E. Scuseria, M. A. Robb, J. R. Cheeseman, V. G. Zakrzewski, J. A. Montgomery, R. E. Stratmann, J. C. Burant, S. Dapprich, J. M. Millam, A. D. Daniels, K. N. Kudin, M. C. Strain, O. Farkas, J. Tomasi, V. Barone, M. Cossi, R. Cammi, B. Mennucci, C. Pomelli, C. Adamo, S. Clifford, J. Ochterski, G. A. Petersson, P. Y. Ayala, Q. Cui, K. Morokuma, D. K. Malick, A. D. Rabuck, K. Raghavachari, J. B. Foresman, J. Cioslowski, J. V. Ortiz, A. G. Baboul, B. B. Stefanov, G. Liu, A. Liashenko, P. Piskorz, I. Komaromi, R. Gomperts, R. L. Martin, D. J. Fox, T. Keith, M. A. Laham, C. Y. Peng, A. Nanayakkara, C. Gonzalez, M. Challacombe, P. M. W. Gill, B. Johnson, W. Chen, M. W. Wong, J. L. Andres, C. Gonzalez, M. Head-Gordon, E. S. Replogle and J. A. Pople, Gaussian 09, revision A. 01; Gaussian, Inc.: Wallingford, CT, 2009.
- 2 (a) A. D. Becke, *J. Chem. Phys.*, 1993, **98**, 5648-5652; (b) P. J. Stephens, F. J. Devlin, C. F. Chabalowski and M. J. Frisch, *J. Phys. Chem.*, 1994, **98**, 11623-11627.
- 3 P. C. Hariharan and J. A. Pople, *Theor. Chim. Acta.*, 1973, **28**, 213-222.
- 4 J. W. Ochterski, G. A. Petersson and J. A. Montgomery, *J. Chem. Phys.*, 1996, **104**, 2598.
- 5 Peerboom, R.A.L.; Ingemann, S.; Nibbering, N.M.M.; Liebman, J.F., *J. Chem. Soc. Perkin Trans.*, 1990, **2**, 1825-1828.

## 2. Crystallographic data and refinement parameters of 3

**Table S2.** Crystal data and structure refinement for 3.

|                                             |                                                                |
|---------------------------------------------|----------------------------------------------------------------|
| CCDC                                        | 1896042                                                        |
| Empirical formula                           | C <sub>16</sub> H <sub>16</sub> N <sub>12</sub> O <sub>6</sub> |
| Formula weight                              | 472.41                                                         |
| Temperature/K                               | 173                                                            |
| Crystal system                              | monoclinic                                                     |
| Space group                                 | Cc                                                             |
| a/Å                                         | 5.0217(11)                                                     |
| b/Å                                         | 27.895(6)                                                      |
| c/Å                                         | 15.205(3)                                                      |
| α/°                                         | 90                                                             |
| β/°                                         | 97.057(5)                                                      |
| γ/°                                         | 90                                                             |
| Volume/Å <sup>3</sup>                       | 2113.8(8)                                                      |
| Z                                           | 4                                                              |
| ρ <sub>calc</sub> g/cm <sup>3</sup>         | 1.484                                                          |
| μ/mm <sup>-1</sup>                          | 0.118                                                          |
| F(000)                                      | 976.0                                                          |
| Crystal size/mm <sup>3</sup>                | 0.19 × 0.12 × 0.08                                             |
| Radiation                                   | MoKα (λ = 0.71073)                                             |
| Theta range for data collection/°           | 2.92 to 52.95                                                  |
| Index ranges                                | -6 ≤ h ≤ 6, -34 ≤ k ≤ 34, -16 ≤ l ≤ 18                         |
| Reflections collected                       | 6766                                                           |
| Independent reflections                     | 2796 [R <sub>int</sub> = 0.0487, R <sub>sigma</sub> = 0.0789]  |
| Data/restraints/parameters                  | 3648/650/329                                                   |
| Goodness-of-fit on F <sup>2</sup>           | 1.024                                                          |
| Final R indexes [I ≥ 2σ(I)]                 | R <sub>1</sub> = 0.0487, wR <sub>2</sub> = 0.0995              |
| Final R indexes [all data]                  | R <sub>1</sub> = 0.0896, wR <sub>2</sub> = 0.1173              |
| Largest diff. peak/hole / e Å <sup>-3</sup> | 0.24/-0.20                                                     |

**Table S3.** Bond Lengths for 3.

| Atom | Atom | Length/Å | Atom | Atom | Length/Å |
|------|------|----------|------|------|----------|
| O4   | C14  | 1.322(6) | O2   | N9   | 1.383(6) |
| O4   | C15  | 1.453(6) | C12  | C13  | 1.488(7) |
| O3   | C14  | 1.207(6) | N6   | C8   | 1.413(7) |

|     |     |          |     |     |           |
|-----|-----|----------|-----|-----|-----------|
| N12 | C12 | 1.337(6) | C14 | C13 | 1.503(7)  |
| N12 | C11 | 1.367(6) | N5  | C8  | 1.313(6)  |
| O1  | N4  | 1.396(5) | C8  | C7  | 1.418(7)  |
| O1  | N5  | 1.360(6) | C11 | C10 | 1.462(7)  |
| N2  | N1  | 1.353(5) | C5  | C4  | 1.481(7)  |
| N2  | C6  | 1.344(6) | N8  | C9  | 1.303(6)  |
| N3  | C5  | 1.365(6) | C10 | N9  | 1.313(7)  |
| N3  | C6  | 1.328(6) | C10 | C9  | 1.424(7)  |
| N10 | N11 | 1.358(5) | C7  | C6  | 1.465(7)  |
| N10 | C11 | 1.323(7) | O6  | C3  | 1.322(7)  |
| N7  | N6  | 1.248(5) | O6  | C2  | 1.534(13) |
| N7  | C9  | 1.416(7) | O6  | C18 | 1.554(15) |
| N1  | C5  | 1.330(6) | C3  | C4  | 1.500(8)  |
| N11 | C12 | 1.330(6) | C15 | C16 | 1.486(9)  |
| O5  | C3  | 1.178(7) | C2  | C1  | 1.458(17) |
| N4  | C7  | 1.327(6) | C18 | C17 | 1.40(2)   |
| O2  | N8  | 1.374(6) |     |     |           |

**Table S4.** Bond Angles for **3**.

| Atom | Atom | Atom | Angle/°  | Atom | Atom | Atom | Angle/°  |
|------|------|------|----------|------|------|------|----------|
| C14  | O4   | C15  | 117.3(4) | N1   | C5   | N3   | 113.8(4) |
| C12  | N12  | C11  | 102.5(4) | N1   | C5   | C4   | 122.6(5) |
| N5   | O1   | N4   | 111.9(4) | C9   | N8   | O2   | 104.6(4) |
| C6   | N2   | N1   | 109.3(4) | N9   | C10  | C11  | 121.2(5) |
| C6   | N3   | C5   | 102.9(4) | N9   | C10  | C9   | 108.9(5) |
| C11  | N10  | N11  | 101.9(4) | C9   | C10  | C11  | 129.9(5) |
| N6   | N7   | C9   | 111.8(4) | C12  | C13  | C14  | 113.5(4) |
| C5   | N1   | N2   | 103.4(4) | N4   | C7   | C8   | 108.4(5) |
| C12  | N11  | N10  | 111.1(4) | N4   | C7   | C6   | 115.4(5) |
| C7   | N4   | O1   | 104.5(4) | C8   | C7   | C6   | 136.2(5) |
| N8   | O2   | N9   | 112.3(4) | C10  | N9   | O2   | 104.5(4) |
| N12  | C12  | C13  | 126.6(4) | N2   | C6   | C7   | 126.4(4) |
| N11  | C12  | N12  | 109.6(4) | N3   | C6   | N2   | 110.6(4) |
| N11  | C12  | C13  | 123.8(4) | N3   | C6   | C7   | 123.0(4) |
| N7   | N6   | C8   | 114.2(4) | N7   | C9   | C10  | 126.3(4) |
| O4   | C14  | C13  | 109.9(4) | N8   | C9   | N7   | 123.9(5) |
| O3   | C14  | O4   | 124.7(5) | N8   | C9   | C10  | 109.8(5) |

|     |     |     |          |     |     |     |           |
|-----|-----|-----|----------|-----|-----|-----|-----------|
| O3  | C14 | C13 | 125.4(4) | C3  | O6  | C2  | 112.0(7)  |
| C8  | N5  | O1  | 105.3(5) | C3  | O6  | C18 | 116.9(9)  |
| N6  | C8  | C7  | 137.0(5) | O5  | C3  | O6  | 124.3(6)  |
| N5  | C8  | N6  | 113.2(5) | O5  | C3  | C4  | 125.9(5)  |
| N5  | C8  | C7  | 109.9(5) | O6  | C3  | C4  | 109.8(5)  |
| N12 | C11 | C10 | 123.0(4) | O4  | C15 | C16 | 106.6(5)  |
| N10 | C11 | N12 | 114.9(4) | C5  | C4  | C3  | 112.8(5)  |
| N10 | C11 | C10 | 122.0(4) | C1  | C2  | O6  | 101.5(11) |
| N3  | C5  | C4  | 123.6(5) | C17 | C18 | O6  | 103.6(17) |

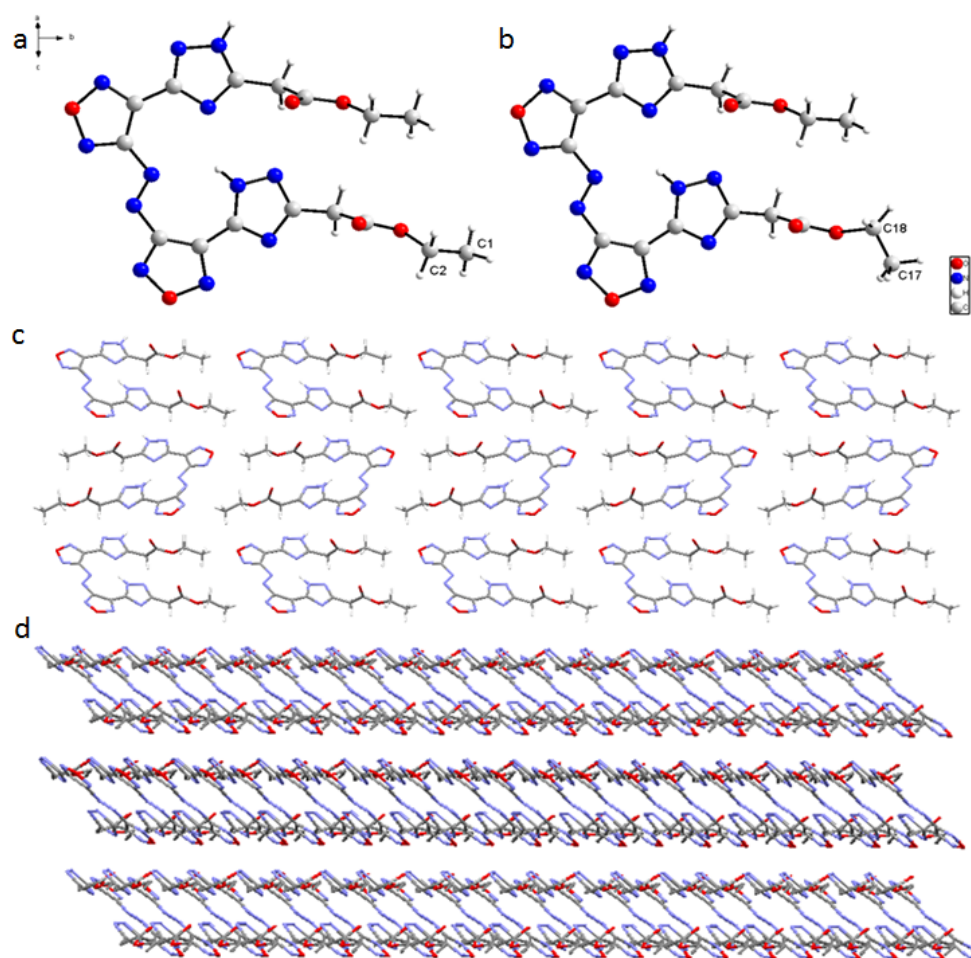

**Fig. S2** Single-crystal X-ray structure of **3** (ellipsoids are set at 50% probability) (a) The part of the 2-fold disordered atoms with higher occupancy (0.50); (b) The part of the 2-fold disordered atoms with lower occupancy (0.50); (c) Stacking diagram of **3** (viewed along the *a*-axis); (d) Stacking diagram of **3** (viewed along the *b*-axis)

### 3. Mass spectrum

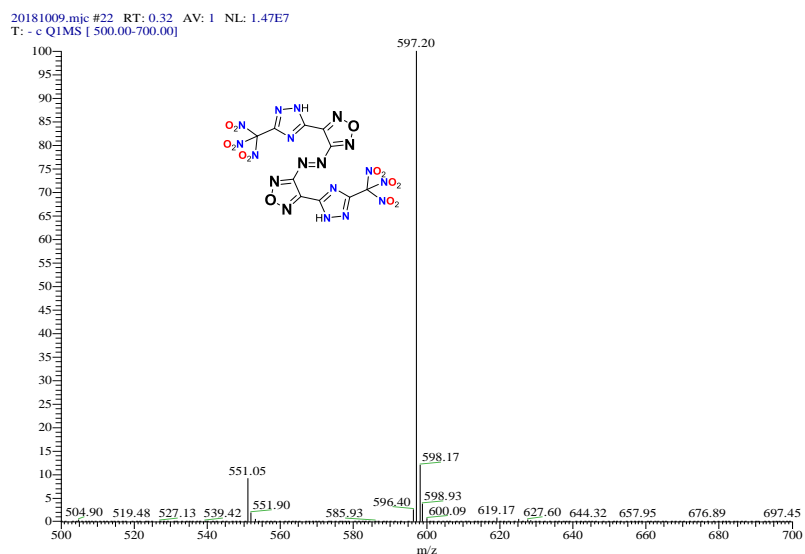

Fig.S3 Mass spectrum of 8.

### 4. <sup>1</sup>H NMR, <sup>13</sup>C NMR spectra

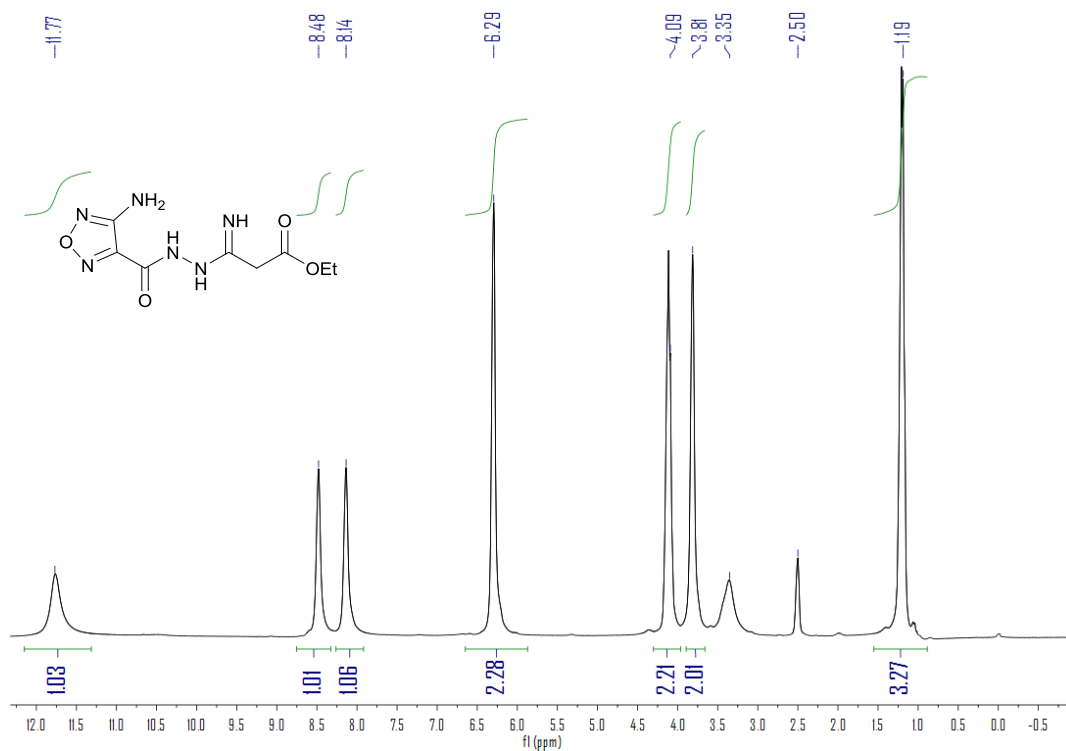

Fig. S4 <sup>1</sup>H-NMR spectra (300 MHz) of 1 in DMSO-*d*<sub>6</sub> at 25 °C



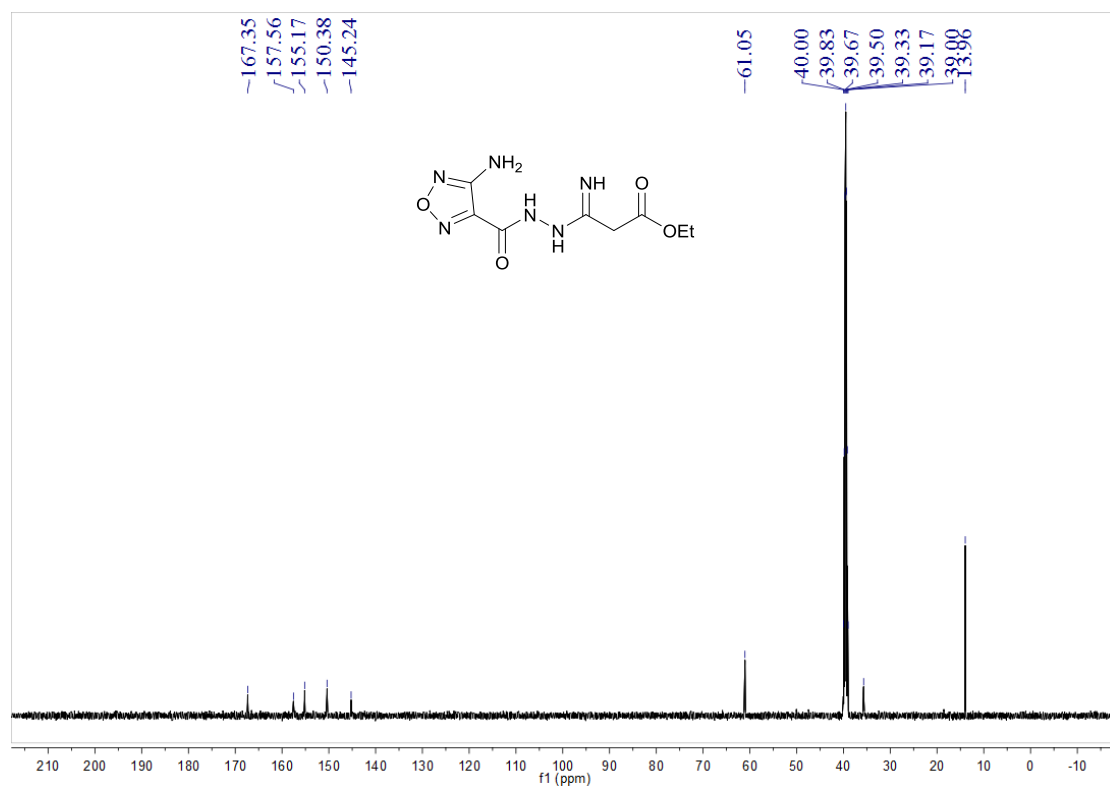

Fig. S5 <sup>13</sup>C-NMR spectra (126 MHz) of **1** in DMSO-*d*<sub>6</sub> at 25 °C

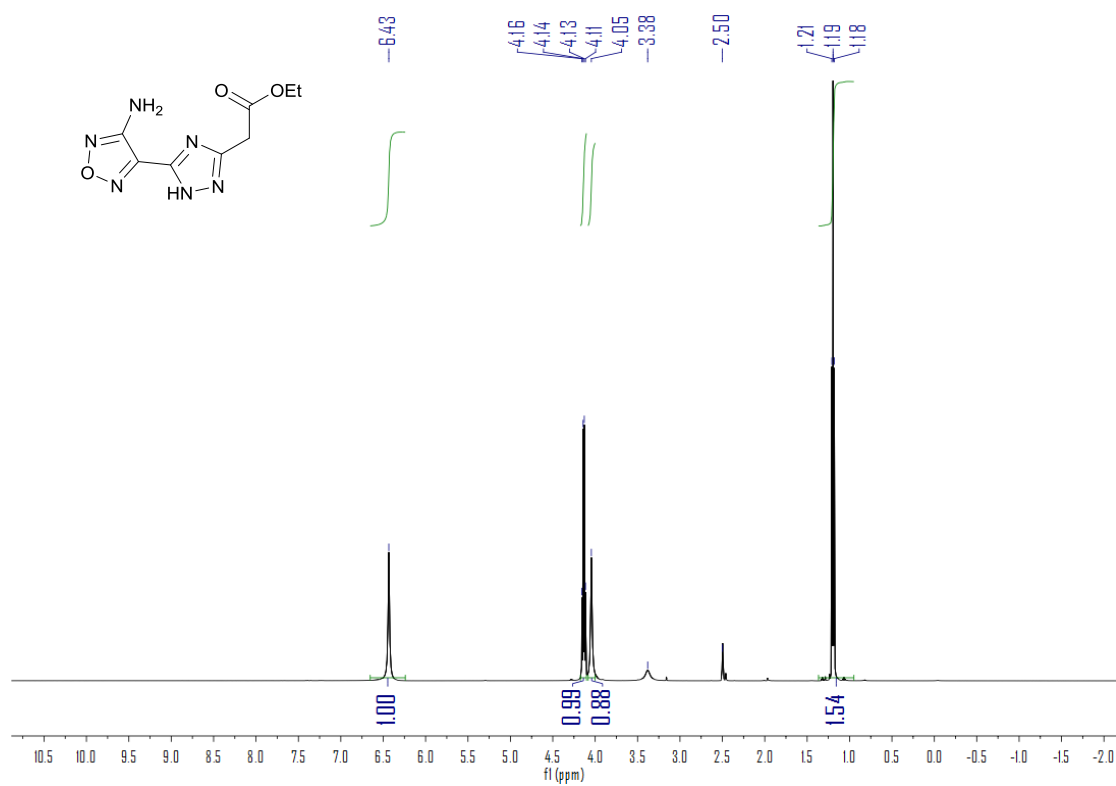

Fig. S6 <sup>1</sup>H-NMR spectra (300 MHz) of **2** in DMSO-*d*<sub>6</sub> at 25 °C

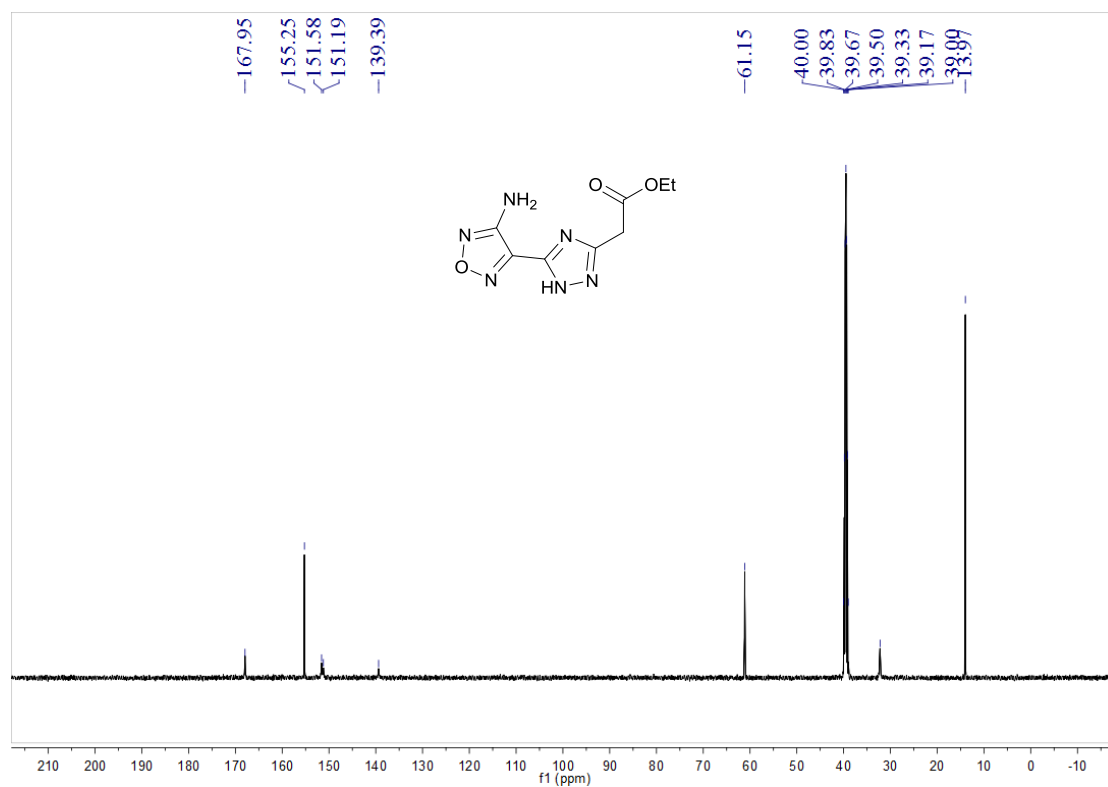

Fig. S7  $^{13}\text{C-NMR}$  spectra (126 MHz) of **2** in  $\text{DMSO-}d_6$  at 25 °C

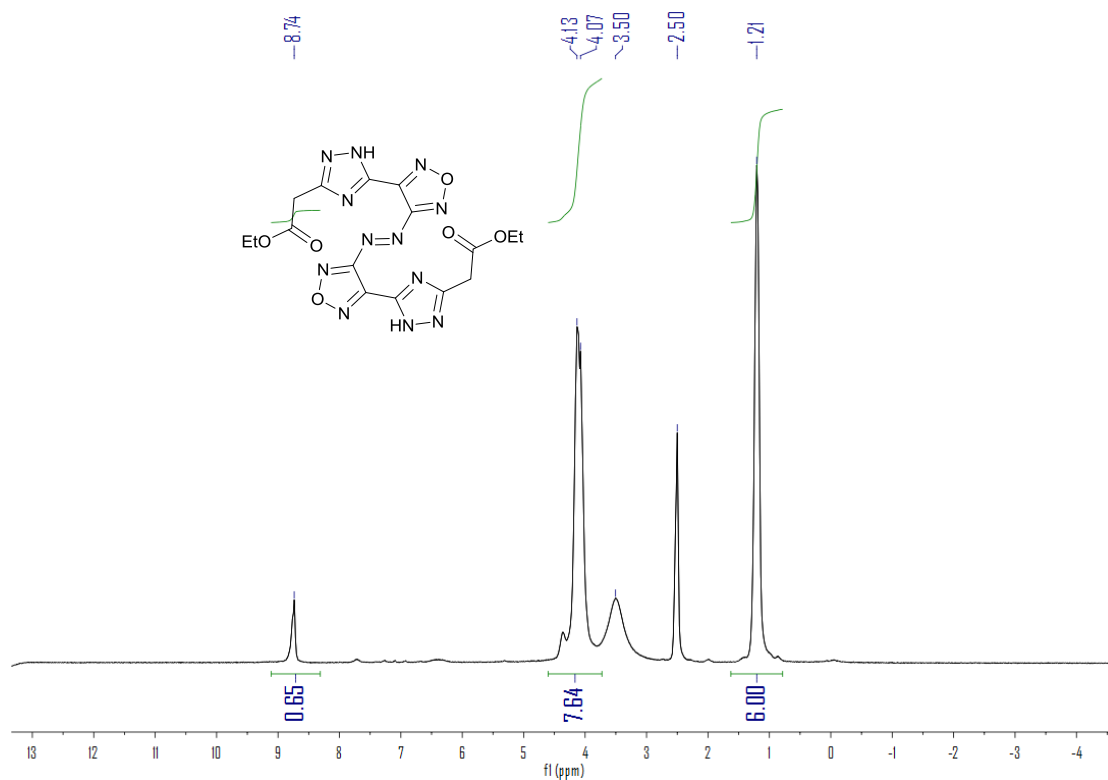

Fig. S8  $^1\text{H-NMR}$  spectra (300 MHz) of **3** in  $\text{DMSO-}d_6$  at 25 °C

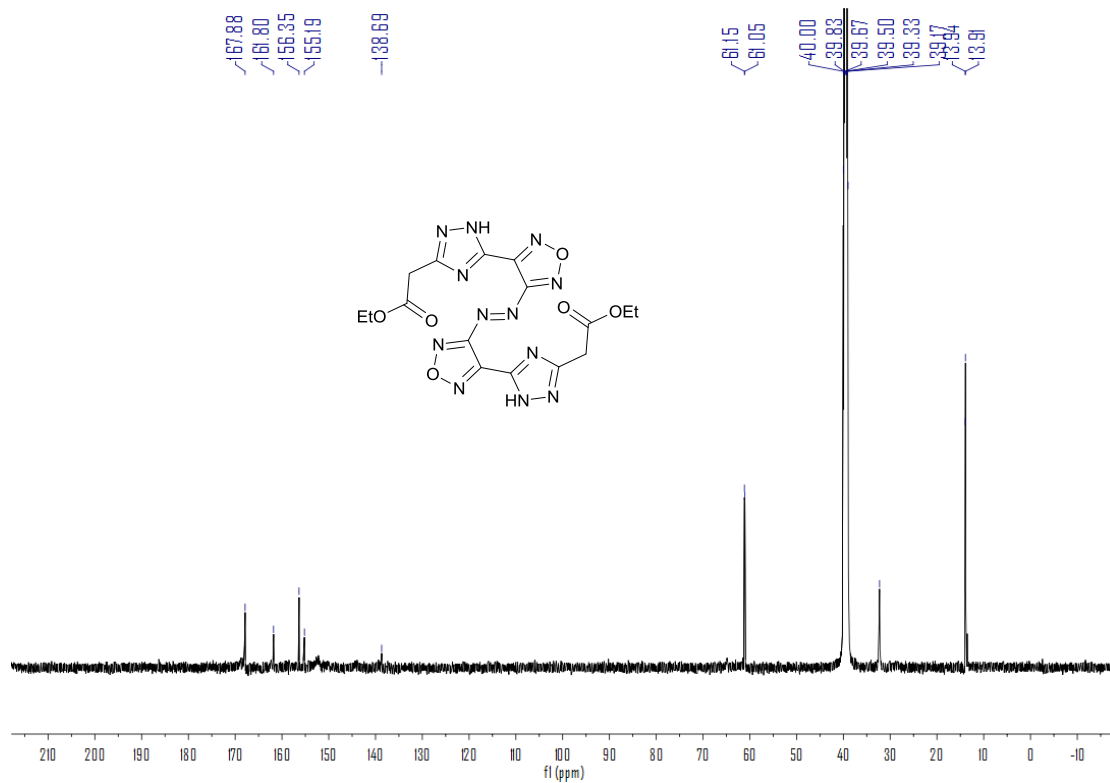

Fig. S9 <sup>13</sup>C-NMR spectra (126 MHz) of 3 in DMSO-*d*<sub>6</sub> at 25 °C

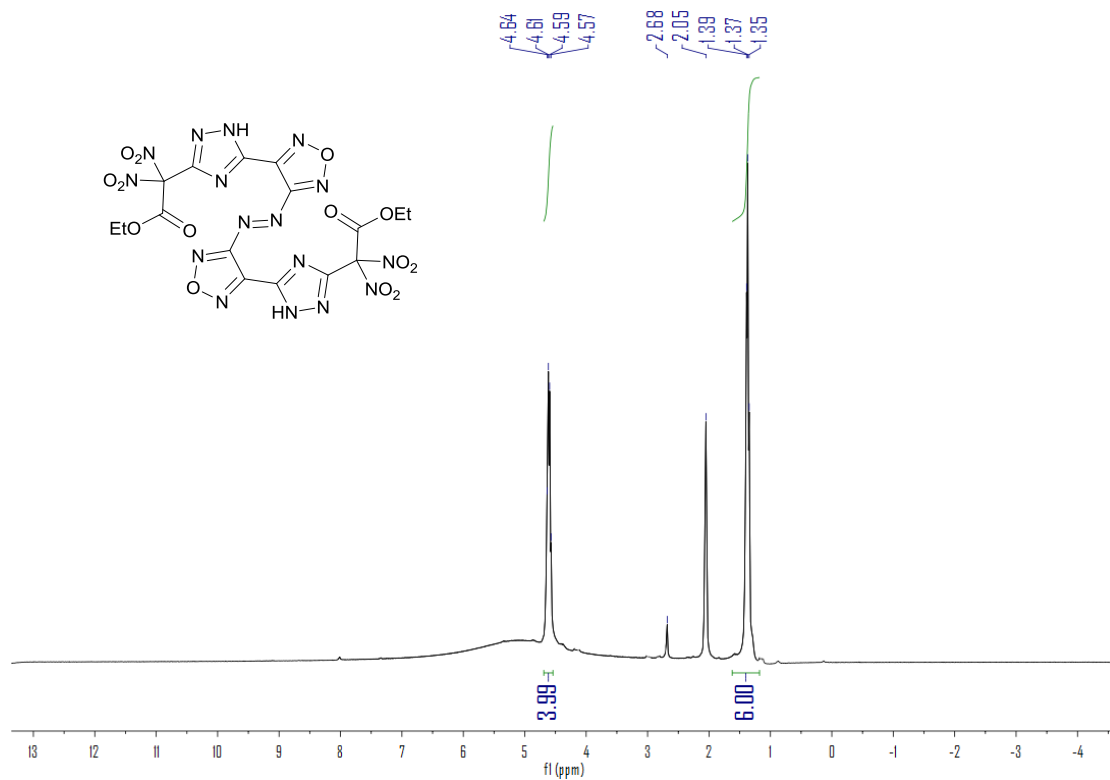

Fig. S10 <sup>1</sup>H-NMR spectra (300 MHz) of 4 in Acetone-*d*<sub>6</sub> at 25 °C

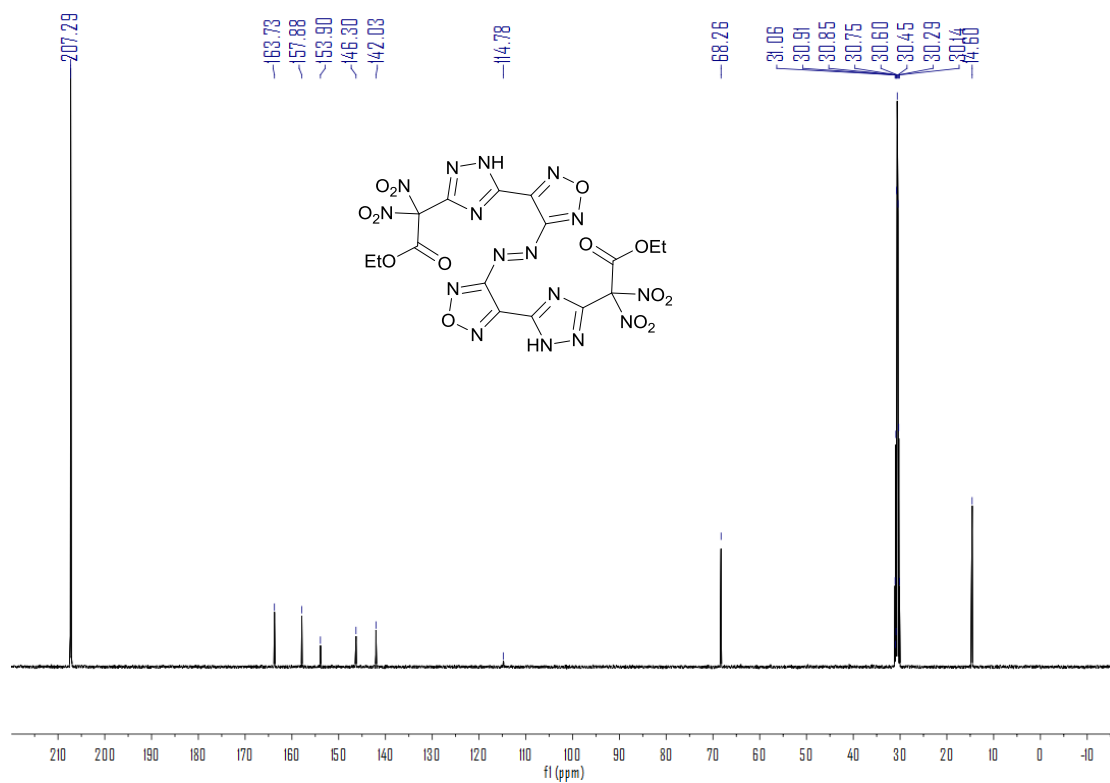

**Fig. S11**  $^{13}\text{C}$ -NMR spectra (126 MHz) of **4** in Acetone- $d_6$  at 25 °C

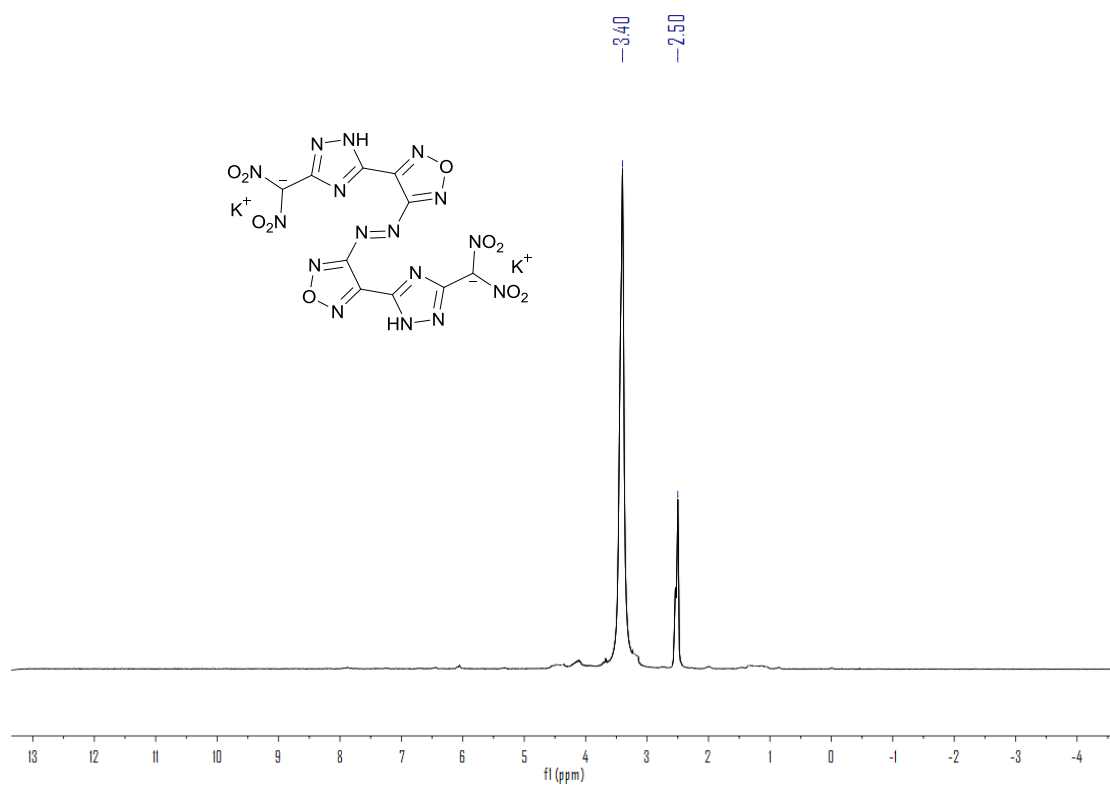

**Fig. S12**  $^1\text{H}$ -NMR spectra (300 MHz) of **5** in DMSO- $d_6$  at 25 °C

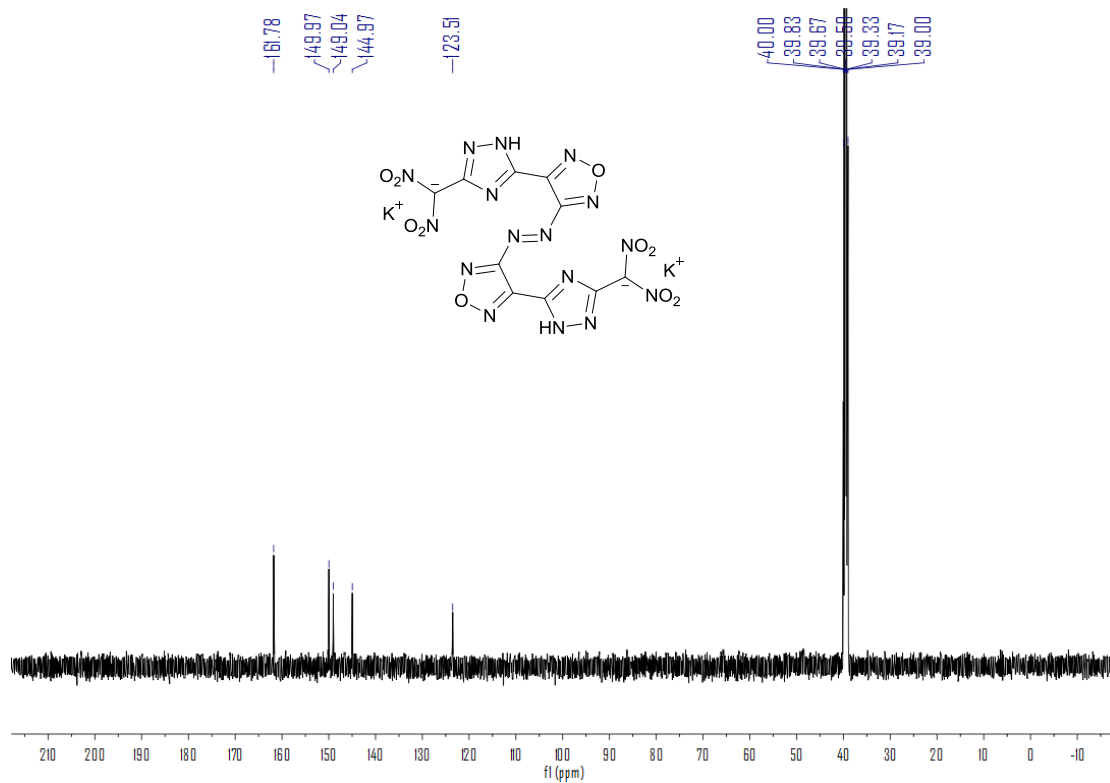

Fig. S13 <sup>13</sup>C-NMR spectra (126 MHz) of **5** in DMSO-*d*<sub>6</sub> at 25 °C

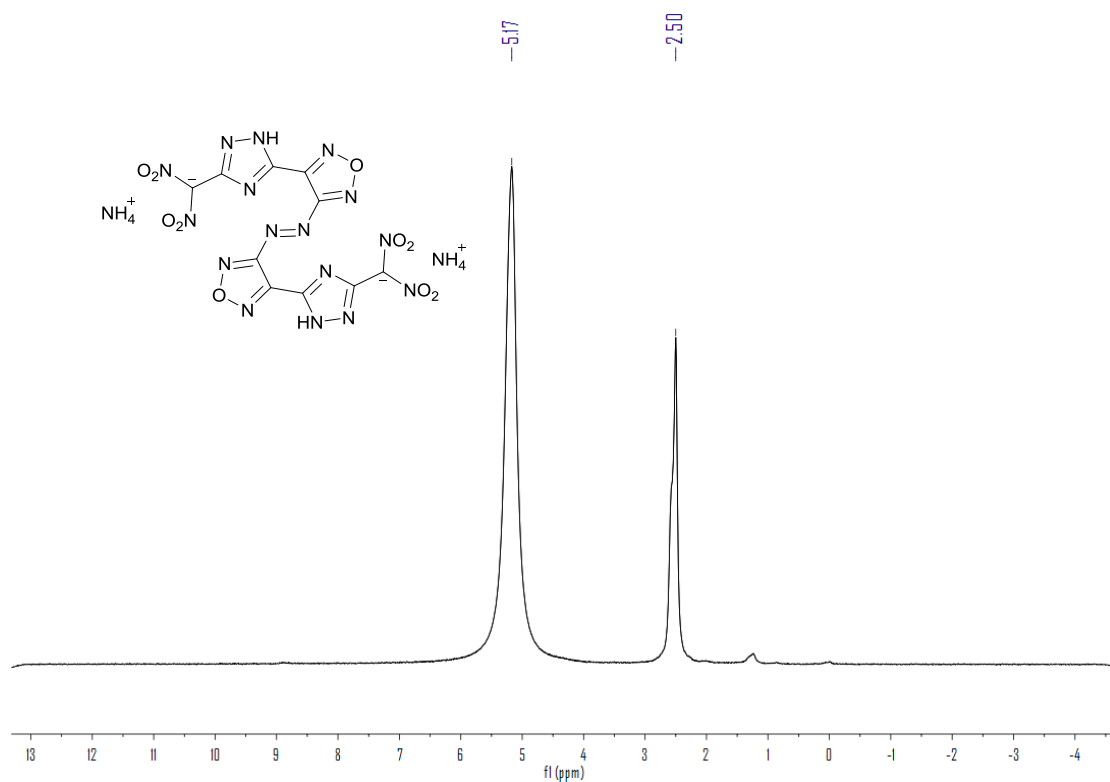

Fig. S14 <sup>1</sup>H-NMR spectra (300 MHz) of **6** in DMSO-*d*<sub>6</sub> at 25 °C

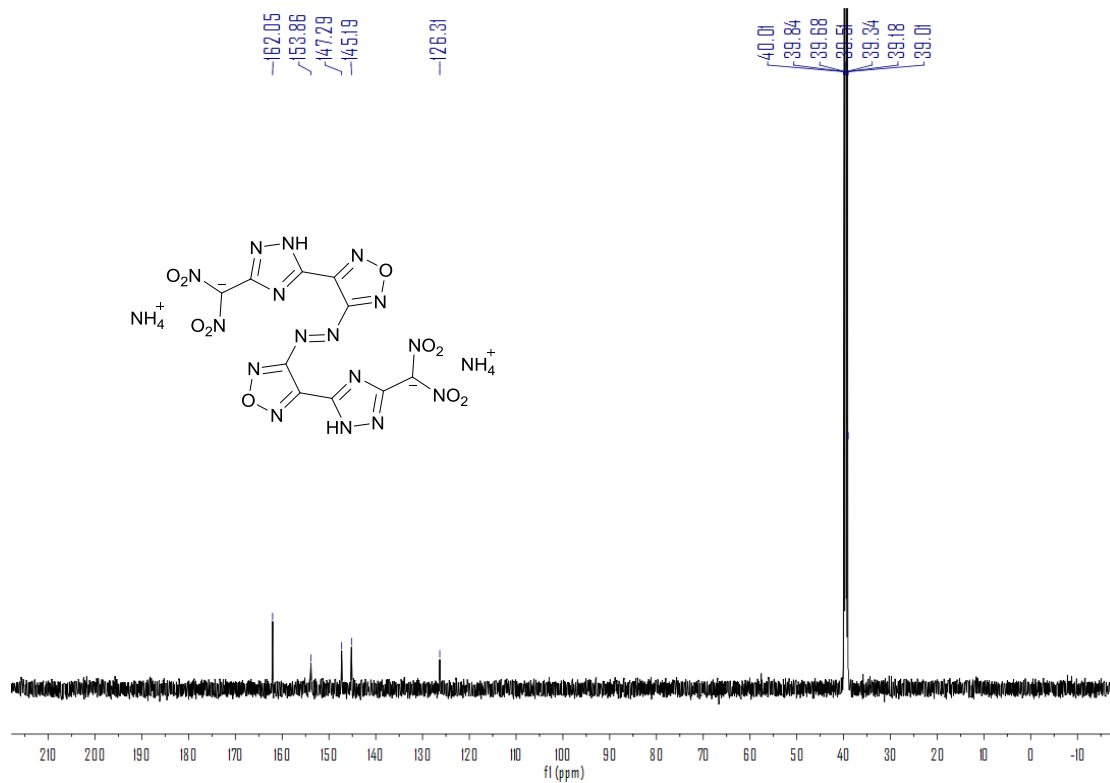

**Fig. S15** <sup>13</sup>C-NMR spectra (126 MHz) of **6** in DMSO-*d*<sub>6</sub> at 25 °C

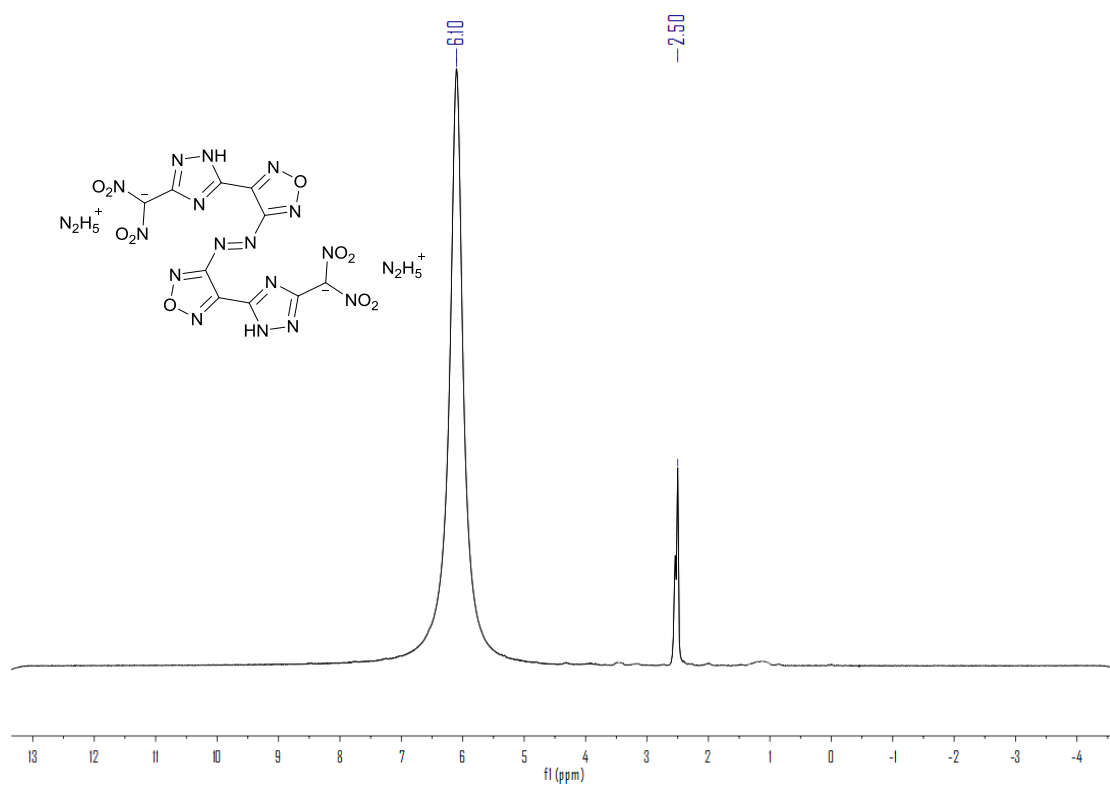

**Fig. S16** <sup>1</sup>H-NMR spectra (300 MHz) of **7** in DMSO-*d*<sub>6</sub> at 25 °C

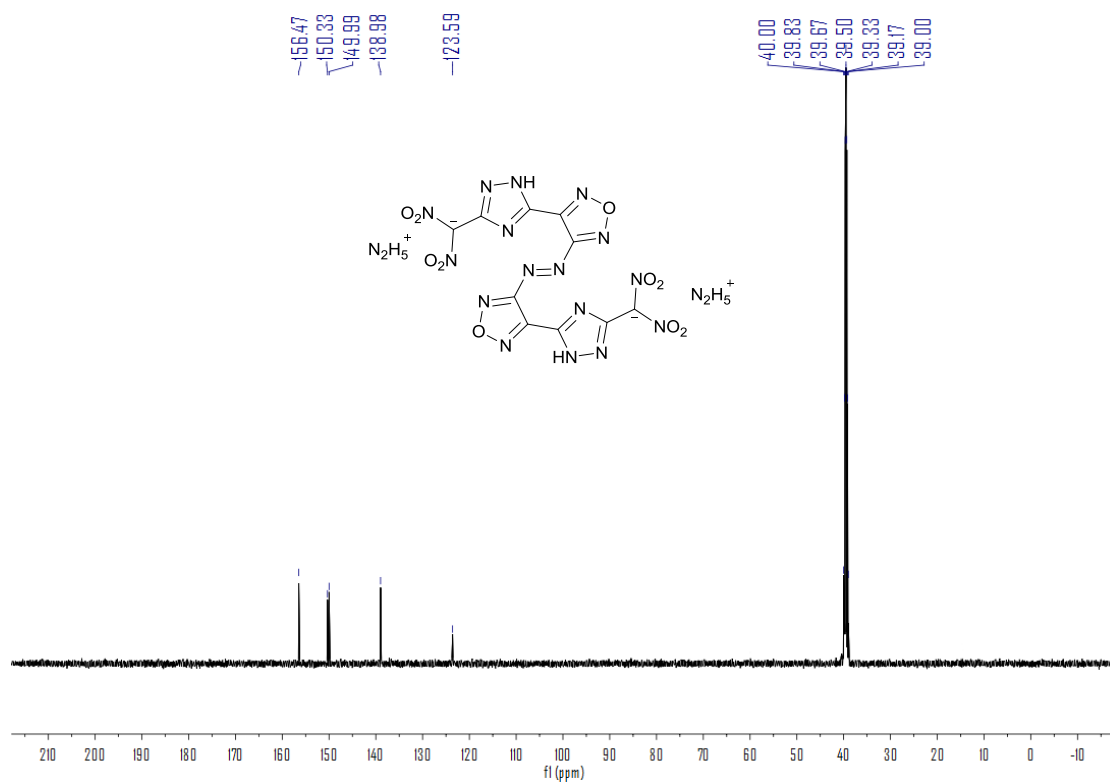

**Fig. S17** <sup>13</sup>C-NMR spectra (126 MHz) of **7** in DMSO-*d*<sub>6</sub> at 25 °C

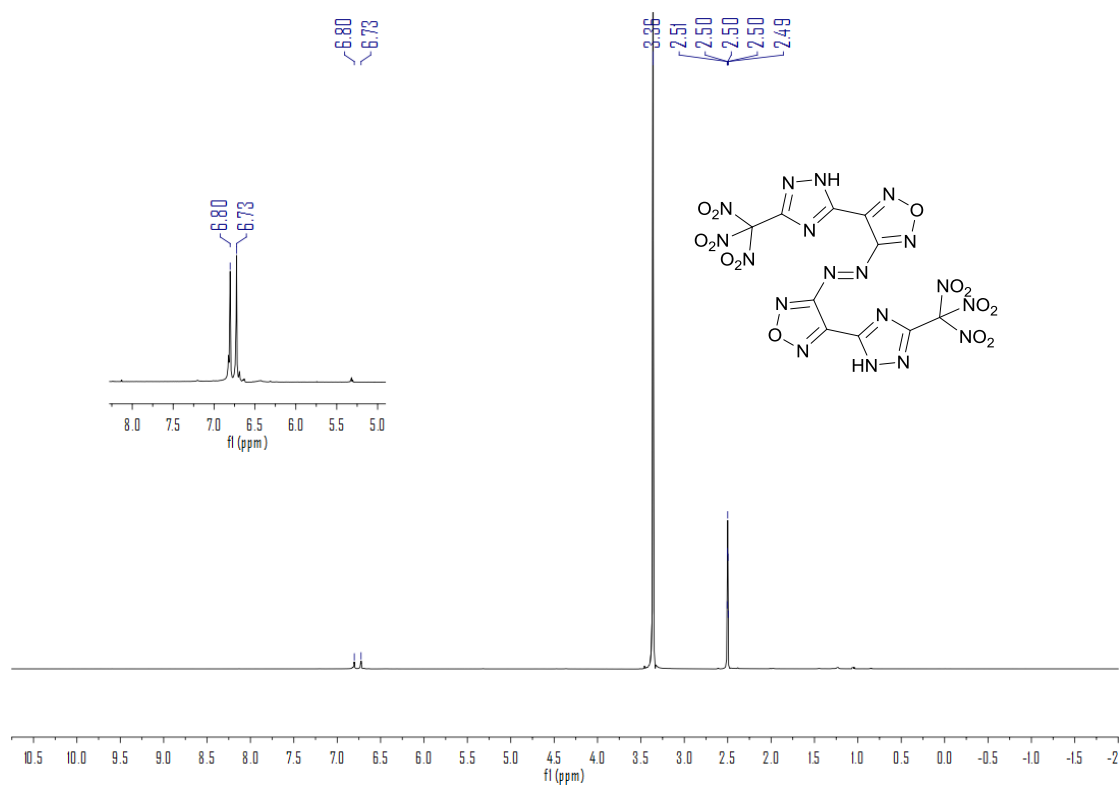

**Fig. S18** <sup>1</sup>H-NMR spectra (500 MHz) of **8** in DMSO-*d*<sub>6</sub> at 25 °C

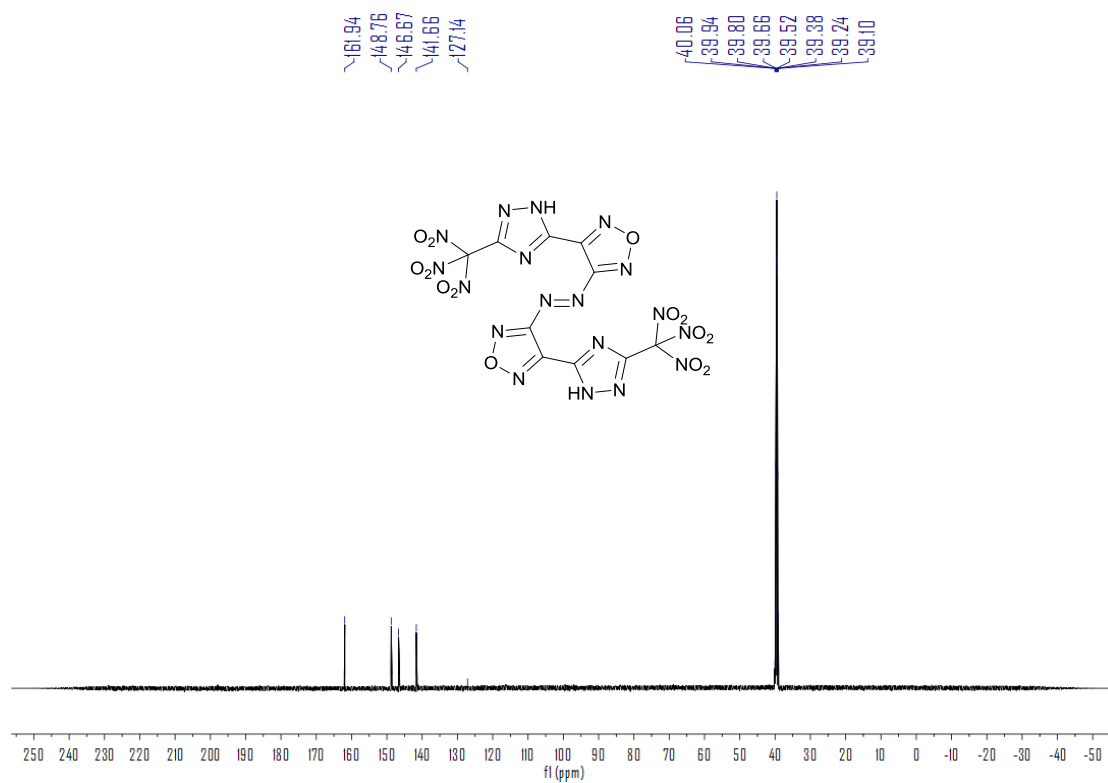

**Fig. S19**  $^{13}\text{C}$ -NMR spectra (126 MHz) of **8** in  $\text{DMSO-}d_6$  at  $25\text{ }^\circ\text{C}$
